# Supplementary material for: End-of-life indicators based on temperature switchable nanobombs
Source: Royal Society of Chemistry journal article supplement (doi:10.1039/c2jm30333g), 2012-01-01
Supplement: c2jm30333g.pdf [file c2jm30333g.pdf]

## Supplementary Information for the manuscript:

### End-of-life indicators based on temperature switchable nanobombs

Anika Hamberger,<sup>a</sup> Ana-Maria Popa,<sup>b</sup> Rene M. Rossi,<sup>b</sup> Daniel Kattnig,<sup>a</sup> Dariush Hinderberger,<sup>a</sup> Katharina Landfester,<sup>a</sup> Daniel Crespy\*<sup>a</sup>

<sup>a</sup> Max Planck Institute for Polymer Research, Mainz, Germany

<sup>b</sup> Empa, Swiss Federal Laboratories for Materials Testing and Research, Laboratory for protection and Physiology, St. Gallen, Switzerland

E-Mail: [crespy@mpip-mainz.mpg.de](mailto:crespy@mpip-mainz.mpg.de)

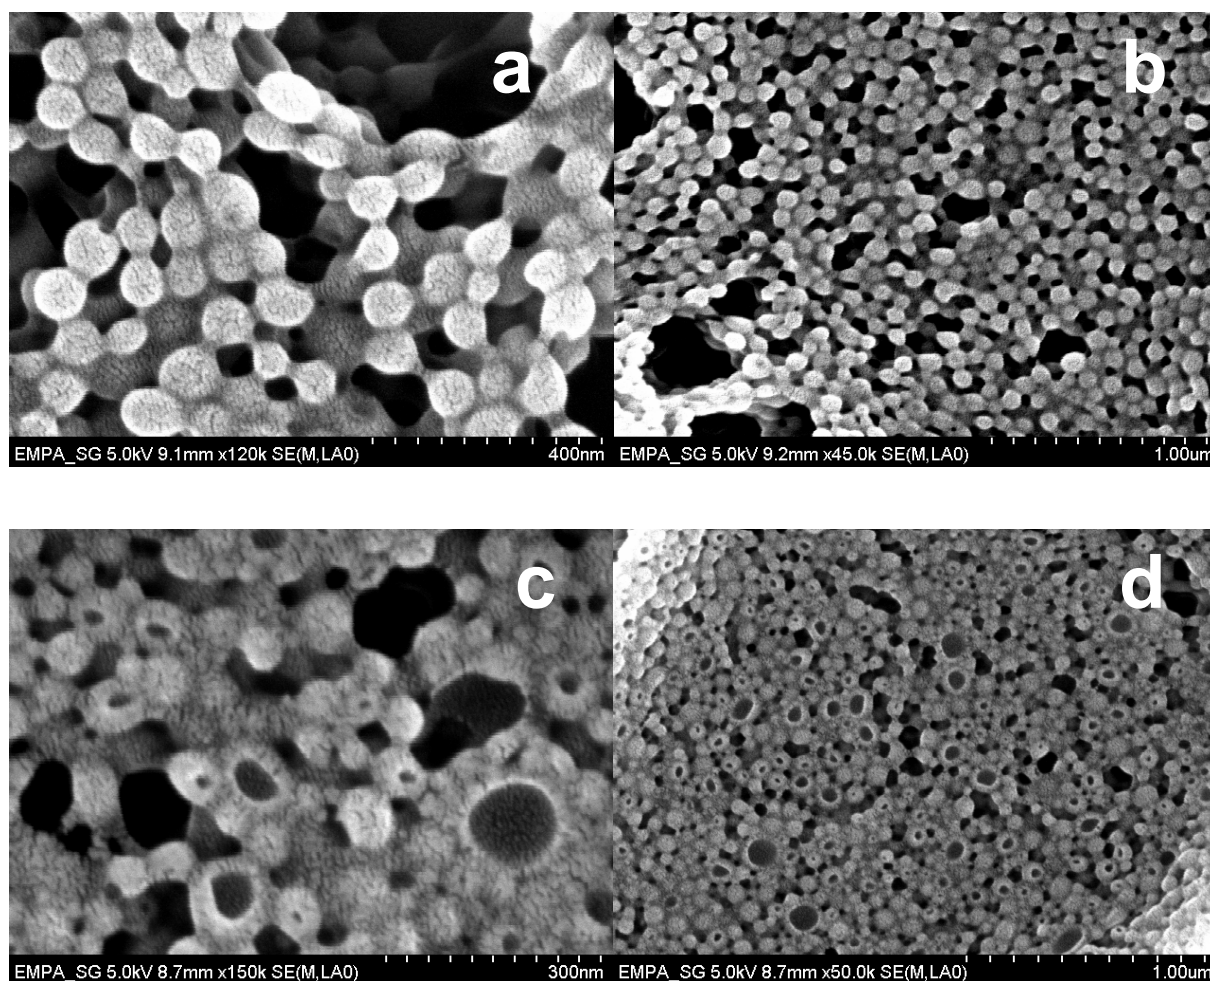

**Fig. S1** SEM micrographs of PMMA nanoparticles containing V59 before (a,b) and after (c,d) exposure to 90°C.

**Table S1** Weight-% of remaining azo-component V59 in PMMA nanoparticles after heating at different temperatures and for different time determined by HPLC.

| <i>t</i> |     | <i>m</i> <sub>V59</sub> [%] |       |
|----------|-----|-----------------------------|-------|
| [min]    | [h] | 100 °C                      | 75 °C |
| 10       |     | 86.3                        | -     |
| 15       |     | 63.7                        | -     |
| 30       |     | 17.8                        | 88.5  |
| 45       |     | 5.0                         |       |
|          | 1   | 4.1                         | 89.7  |
|          | 2   | 0.0                         | -     |
|          | 3   |                             | 56.9  |
|          | 6   |                             | 27.5  |
|          | 8   |                             | 17.8  |
|          | 10  |                             | 10.6  |
|          | 19  |                             | 2.9   |
|          | 24  |                             | 0.0   |

**Table S2** Composition, yield, and hydrodynamic diameters of the dispersions prepared with DMAMAB, FatBrown RR, and PNaph as hydrophobic dyes.

| Entry     | Dye         |               | V59<br>[wt.%] | Yield<br>[%] | <i>D<sub>h</sub></i><br>[nm] |
|-----------|-------------|---------------|---------------|--------------|------------------------------|
|           | nature      | amount [wt.%] |               |              |                              |
| AH_NE_133 | DMAMAB      | 0.09          | 15.8          | 80           | 98                           |
| AH_NE_131 | DMAMAB      | 0.82          | 15.0          | 99           | 146                          |
| AH_NE_134 | FatBrown RR | 0.08          | 16.2          | 96           | 103                          |
| AH_NE_132 | FatBrown RR | 0.81          | 14.8          | 89           | 96                           |
| AH_NE_053 | PNaph       | 0.27          | 13.6          | 91           | 98                           |
| AH_NE_049 | PNaph       | 1.34          | 13.4          | 84           | 159                          |
| AH_NE_045 | PNaph       | 6.35          | 12.7          | 91           | 172                          |

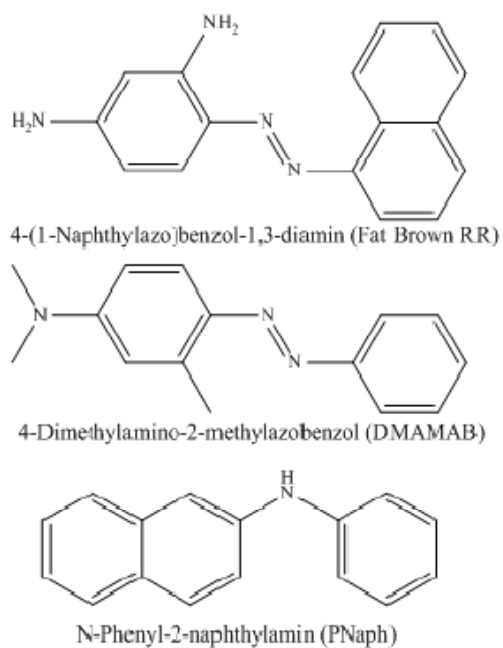

**Fig. S2** Chemical structures of the other hydrophobic dyes used in the study.

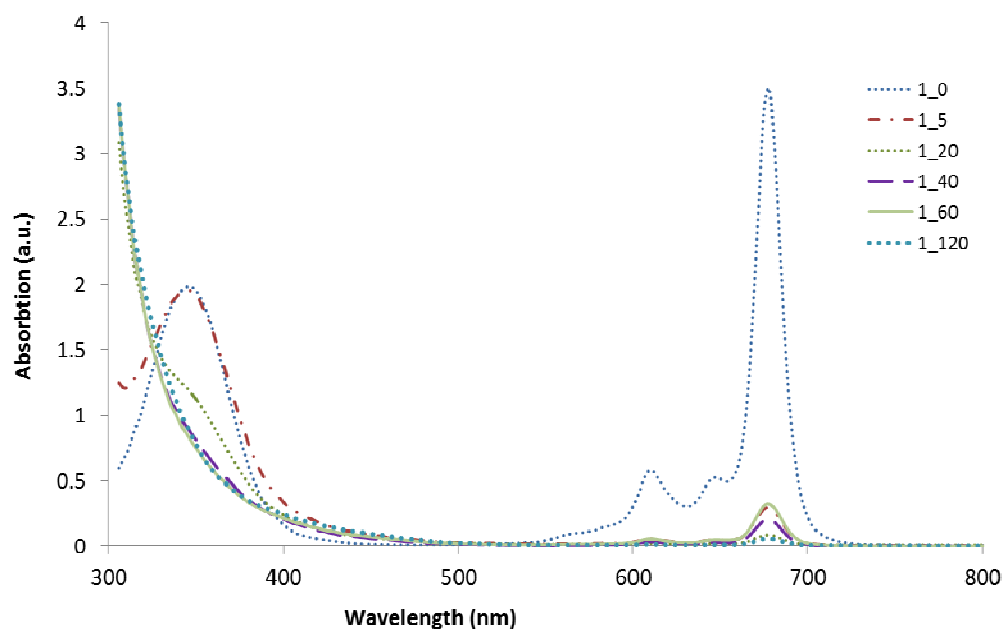

**Fig. S3** UV-vis absorption spectra of the Cut<sub>Bu</sub>PC:V69 solutions as measured after different heating times.

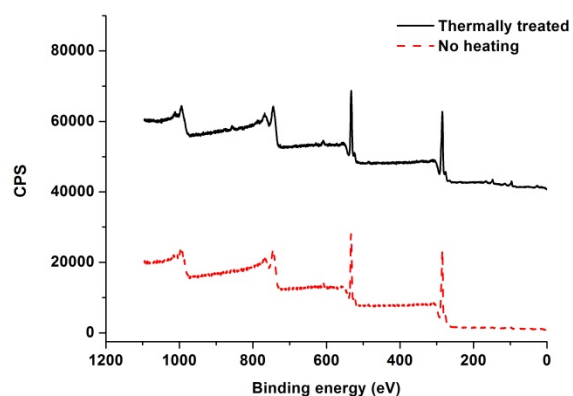

**Fig. S4** XPS survey spectra acquired on a film of capsules deposited on silicon slides, before (---) and after heating (-----). The characteristic band of Cu 2p, at around 935 eV is absent from both spectra.
